# Supplementary material for: Sex and Racial Disparities in Cardiac Rehabilitation Referral at Hospital Discharge and Gaps in Long‐Term Mortality
Source: PubMed Central journal article supplement — J Am Heart Assoc. 2018 Apr 6;7(8):e008088. doi: 10.1161/JAHA.117.008088 (PMC6015394; doi:10.1161/jaha.117.008088), 2018-04-06
Supplement: JAH3-7-e008088-s001.pdf [file JAH3-7-e008088-s001.pdf]

# **SUPPLEMENTAL MATERIAL**

**Table S1. Baseline characteristics of patients and hospitals included and excluded from the analytic sample.**

| Variable                    | Overall<br>N=125,134 | Included<br>N=48,993 | Excluded<br>N=76,141 | P-value | Standardized<br>Difference,<br>% |
|-----------------------------|----------------------|----------------------|----------------------|---------|----------------------------------|
| <b>Demographics</b>         |                      |                      |                      |         |                                  |
| Age, years*                 | 77 (71 - 83)         | 77 (71 - 83)         | 78 (71 - 84)         | <.0001  | 10.9                             |
| Sex                         |                      |                      |                      | 0.04    | 1.2                              |
| Female                      | 59,606 (47.6)        | 23,163 (47.3)        | 36,443 (47.9)        |         |                                  |
| Male                        | 65,528 (52.4)        | 25,830 (52.7)        | 39,698 (52.1)        |         |                                  |
| Race                        |                      |                      |                      | <.0001  |                                  |
| White                       | 95,846 (81.9)        | 40,573 (82.8)        | 55,273 (81.2)        |         | 4.1                              |
| Black                       | 6,699 (5.7)          | 2,775 (5.7)          | 3,924 (5.8)          |         | 0.4                              |
| Hispanic                    | 5,658 (4.8)          | 2,476 (5.1)          | 3,182 (4.7)          |         | 1.8                              |
| Asian                       | 3,806 (3.3)          | 1,191 (2.4)          | 2,615 (3.8)          |         | 8.1                              |
| Other                       | 5,019 (4.3)          | 1,978 (4.0)          | 3,041 (4.5)          |         | 2.1                              |
| Missing, %                  | 8,106 (6.5)          | 0 (0.0)              | 8,106 (10.6)         |         |                                  |
| <b>Cardiac Diagnosis</b>    |                      |                      |                      |         |                                  |
| Heart failure with CAD      | 3,909 (3.1)          | 0 (0.0)              | 3,909 (5.1)          | <.0001  | -                                |
| Confirmed AMI - non-STEMI   | 39,010 (31.2)        | 13,919 (28.4)        | 25,091 (33.0)        |         | 9.9                              |
| Confirmed AMI - STEMI       | 11,584 (9.3)         | 4,590 (9.4)          | 6,994 (9.2)          |         | 0.6                              |
| Confirmed AMI - unspecified | 50,251 (40.2)        | 22,524 (46.0)        | 27,727 (36.4)        |         | 19.5                             |
| Other                       | 7,240 (5.8)          | 0 (0.0)              | 7,240 (9.5)          |         | -                                |
| Peripheral vascular disease | 47 (0.0)             | 0 (0.0)              | 47 (0.1)             |         | -                                |
| Cerebral vascular disease   | 41 (0.0)             | 0 (0.0)              | 41 (0.1)             |         | -                                |
| Unstable angina             | 4,498 (3.6)          | 2,756 (5.6)          | 1,742 (2.3)          |         | 17.2                             |
| Coronary artery disease     | 8,554 (6.8)          | 5,204 (10.6)         | 3,350 (4.4)          |         | 23.8                             |
| <b>Year</b>                 |                      |                      |                      |         |                                  |
| 2009                        | 9,798 (7.8)          | 3,084 (6.3)          | 6,714 (8.8)          | <.0001  | 18.5                             |
| 2008                        | 20,031 (16.0)        | 6,680 (13.6)         | 13,351 (17.5)        |         |                                  |
| 2007                        | 19,512 (15.6)        | 7,270 (14.8)         | 12,242 (16.1)        |         |                                  |
| 2006                        | 19,131 (15.3)        | 7,105 (14.5)         | 12,026 (15.8)        |         |                                  |
| 2005                        | 21,566 (17.2)        | 9,500 (19.4)         | 12,066 (15.8)        |         |                                  |
| 2004                        | 18,855 (15.1)        | 8,076 (16.5)         | 10,779 (14.2)        |         |                                  |
| 2003                        | 16,241 (13.0)        | 7,278 (14.9)         | 8,963 (11.8)         |         |                                  |
| <b>Medical History</b>      |                      |                      |                      |         |                                  |
| Atrial fib/atrial flutter   | 12,096 (13.0)        | 5,482 (11.7)         | 6,614 (14.3)         | <.0001  | 7.8                              |

| Variable                                                            | Overall            | Included           | Excluded           | P-value | Standardized<br>Difference,<br>% |
|---------------------------------------------------------------------|--------------------|--------------------|--------------------|---------|----------------------------------|
|                                                                     | N=125,134          | N=48,993           | N=76,141           |         |                                  |
| COPD or asthma                                                      | 16,576 (17.8)      | 7,967 (17.0)       | 8,609 (18.6)       | <.0001  | 4.3                              |
| Diabetes                                                            | 32,261 (34.7)      | 15,743 (33.6)      | 16,518 (35.8)      | <.0001  | 4.6                              |
| Hyperlipidemia                                                      | 44,080 (47.4)      | 23,065 (49.2)      | 21,015 (45.5)      | <.0001  | 7.4                              |
| Hypertension                                                        | 68,507 (73.6)      | 34,850 (74.4)      | 33,657 (72.9)      | <.0001  | 3.4                              |
| Peripheral vascular disease (PVD)                                   | 11,297 (12.1)      | 5,460 (11.6)       | 5,837 (12.6)       | <.0001  | 3.0                              |
| CAD                                                                 | 16,453 (17.7)      | 8,459 (18.0)       | 7,994 (17.3)       | 0.003   | 1.9                              |
| Prior MI                                                            | 21,517 (23.1)      | 9,891 (21.1)       | 11,626 (25.2)      | <.0001  | 9.7                              |
| Cerebrovascular accident/transient ischemic attack                  | 11,005 (11.8)      | 5,255 (11.2)       | 5,750 (12.4)       | <.0001  | 3.8                              |
| Implantable cardioverter defibrillator                              | 538 (0.6)          | 261 (0.6)          | 277 (0.6)          | 0.38    | 0.6                              |
| Heart failure                                                       | 20,071 (21.6)      | 8,443 (18.0)       | 11,628 (25.2)      | <.0001  | 17.5                             |
| Anemia                                                              | 2,875 (3.1)        | 1,394 (3.0)        | 1,481 (3.2)        | 0.04    | 1.3                              |
| Pacemaker - Biventricular/Resync/ cardiac resynchronization therapy | 1,476 (1.6)        | 739 (1.6)          | 737 (1.6)          | 0.81    | 0.2                              |
| Dialysis (Chronic)                                                  | 2,178 (2.3)        | 911 (1.9)          | 1,267 (2.7)        | <.0001  | 5.3                              |
| Renal insufficiency                                                 | 12,234 (13.1)      | 5,411 (11.5)       | 6,823 (14.8)       | <.0001  | 9.6                              |
| Depression                                                          | 2,258 (2.4)        | 1,241 (2.6)        | 1,017 (2.2)        | <.0001  | 2.9                              |
| Prior PCI or CABG                                                   | 3,805 (4.1)        | 2,186 (4.7)        | 1,619 (3.5)        | <.0001  | 5.9                              |
| Valvular heart disease                                              | 518 (0.6)          | 277 (0.6)          | 241 (0.5)          | 0.15    | 0.9                              |
| Med history panel missing, %                                        | 32,077 (25.6)      | 2,121 (4.3)        | 29,956 (39.3)      | <.0001  | 93.6                             |
| Smoking                                                             | 17,037 (14.0)      | 7,007 (14.6)       | 10,030 (13.6)      | <.0001  | 2.7                              |
| Missing, %                                                          | 3,592 (2.9)        | 957 (2.0)          | 2,635 (3.5)        |         |                                  |
| <b>Measures</b>                                                     |                    |                    |                    |         |                                  |
| Systolic blood pressure, mmHg*                                      | 124 (110 - 139)    | 123 (110 - 138)    | 124 (110 - 140)    | 0.0005  | 3.5                              |
| Missing, %                                                          | 45,025 (36.0)      | 4,959 (10.1)       | 40,066 (52.6)      |         |                                  |
| BMI*                                                                | 26.6 (23.4 - 30.3) | 26.6 (23.5 - 30.4) | 26.5 (23.2 - 30.2) | <.0001  | 3.5                              |
| Missing, %                                                          | 38,423 (30.7)      | 4,898 (10.0)       | 33,525 (44.0)      |         |                                  |
| Ejection fraction*                                                  | 50 (35 - 59)       | 50 (38 - 60)       | 47 (35 - 58)       | <.0001  | 11.2                             |
| Missing, %                                                          | 36,108 (28.9)      | 12,250 (25.0)      | 23,858 (31.3)      |         |                                  |
| Ejection fraction <40% or moderate or severe dysfunction            | 29,585 (29.2)      | 10,973 (25.9)      | 18,612 (31.5)      | <.0001  | 12.2                             |
| Missing, %                                                          | 23,683 (18.9)      | 6,689 (13.7)       | 16,994 (22.3)      |         |                                  |
| <b>In-Hospital Procedures</b>                                       |                    |                    |                    |         |                                  |
| No procedure                                                        | 18,190 (21.9)      | 6,402 (15.1)       | 11,788 (29.0)      | <.0001  | 34.2                             |
| Cardiac cath/coronary angiography                                   | 49,363 (59.4)      | 28,025 (66.0)      | 21,338 (52.6)      | <.0001  | 27.6                             |
| Cardioversion                                                       | 317 (0.4)          | 156 (0.4)          | 161 (0.4)          | 0.49    | 0.5                              |
| CABG or cardiac valve surgery                                       | 9,291 (11.9)       | 5,467 (12.9)       | 3,824 (10.7)       | <.0001  | 9.3                              |
| PCI or PCI with stent                                               | 37,589 (45.3)      | 22,056 (52.0)      | 15,533 (38.3)      | <.0001  | 27.8                             |
| Cardiac resynchronization therapy -P                                | 160 (0.2)          | 88 (0.2)           | 72 (0.2)           | 0.84    | 0.5                              |

| Variable                                    | Overall<br>N=125,134 | Included<br>N=48,993 | Excluded<br>N=76,141 | P-value | Standardized<br>Difference,<br>% |
|---------------------------------------------|----------------------|----------------------|----------------------|---------|----------------------------------|
| or CRT-D                                    |                      |                      |                      |         |                                  |
| Implantable cardioverter defibrillator only | 275 (0.3)            | 162 (0.4)            | 113 (0.3)            | 0.009   | 1.8                              |
| Dialysis or ultrafiltration, or unspecified | 326 (0.4)            | 135 (0.3)            | 191 (0.5)            | <.0001  | 3.1                              |
| Mechanical ventilation                      | 2,388 (2.9)          | 1,093 (2.6)          | 1,295 (3.2)          | <.0001  | 3.7                              |
| Right cardiac catheterization               | 1,022 (1.2)          | 671 (1.6)            | 351 (0.9)            | <.0001  | 6.5                              |
| Procedure panel missing, %                  | 42,098 (33.6)        | 6,545 (13.4)         | 35,553 (46.7)        | <.0001  | 78.1                             |
| <b>Hospital Characteristics</b>             |                      |                      |                      |         |                                  |
| Number of beds*                             | 331 (209 - 504)      | 342 (226 - 527)      | 327 (202 - 472)      | <.0001  | 19.2                             |
| Missing, %                                  | 95 (0.1)             | 0 (0.0)              | 95 (0.1)             |         |                                  |
| Region                                      |                      |                      |                      | <.0001  |                                  |
| West                                        | 29,090 (23.2)        | 8,547 (17.4)         | 20,543 (27.0)        |         | 23.1                             |
| South                                       | 40,506 (32.4)        | 17,433 (35.6)        | 23,073 (30.3)        |         | 11.3                             |
| Midwest                                     | 30,813 (24.6)        | 13,781 (28.1)        | 17,032 (22.4)        |         | 13.3                             |
| Northeast                                   | 24,725 (19.8)        | 9,232 (18.8)         | 15,493 (20.3)        |         | 3.8                              |
| Academic hospital                           | 67,783 (54.2)        | 28,873 (59.0)        | 38,910 (51.2)        | <.0001  | 15.8                             |
| Missing, %                                  | 160 (0.1)            | 47 (0.1)             | 113 (0.1)            |         |                                  |
| Rural location                              | 15,259 (12.4)        | 6,020 (12.5)         | 9,239 (12.3)         | 0.35    | 0.5                              |
| Missing, %                                  | 1,780 (1.4)          | 753 (1.5)            | 1,027 (1.3)          |         |                                  |
| Primary PTCA performed for AMI              | 107,293 (87.4)       | 44,180 (91.3)        | 63,113 (84.9)        | <.0001  | 20.1                             |
| Missing, %                                  | 2,412 (1.9)          | 629 (1.3)            | 1,783 (2.3)          |         |                                  |
| Cardiac surgery performed on-site           | 94,128 (76.9)        | 39,751 (82.7)        | 54,377 (73.2)        | <.0001  | 23.1                             |
| Missing, %                                  | 2,724 (2.2)          | 914 (1.9)            | 1,810 (2.4)          |         |                                  |
| Heart transplants performed at site         | 13,906 (11.5)        | 5,541 (11.6)         | 8,365 (11.4)         | 0.31    | 0.6                              |
| Missing, %                                  | 3,715 (3.0)          | 1,084 (2.2)          | 2,631 (3.5)          |         |                                  |

\*Continuous variables presented as median (IQR).

BMI- body mass index; COPD- chronic obstructive pulmonary disease; PVD- peripheral vascular disease; CAD- coronary artery disease; MI- myocardial infarction; PCI- percutaneous coronary intervention; CABG- coronary artery bypass grafting; STEMI- ST-elevation myocardial infarction; NSTEMI- Non-ST-elevation myocardial infarction; AMI- acute myocardial infarction; PTCA- percutaneous transluminal coronary angioplasty

**Table S2. The associations between sex, race, and geographic region with 1-year and 3-year all-cause mortality.**

|                   |           | Deaths         | Unadjusted Analysis |         | Adjusted Analysis |         |
|-------------------|-----------|----------------|---------------------|---------|-------------------|---------|
|                   |           | N (%)          | OR (95% CI)         | P value | OR (95% CI)       | P value |
| <b>At 1 Year</b>  | Overall   | 8,432 (17.21)  |                     |         |                   |         |
| <b>Sex</b>        |           |                |                     |         |                   |         |
|                   | Female    | 4,344 (18.75)  | 1.14 (1.09, 1.20)   | <.0001  | 0.97 (0.92, 1.03) | 0.33    |
|                   | Male      | 4,088 (15.83)  | Reference           |         | Reference         |         |
| <b>Race</b>       |           |                |                     | 0.001   |                   | 0.004   |
|                   | Black     | 558 (20.11)    | 1.24 (1.12, 1.37)   | <.0001  | 1.31 (1.16, 1.47) | <.0001  |
|                   | Hispanic  | 378 (15.27)    | 0.85 (0.75, 0.96)   | 0.008   | 0.92 (0.81, 1.05) | 0.21    |
|                   | Asian     | 248 (20.82)    | 0.97 (0.80, 1.16)   | 0.72    | 0.91 (0.76, 1.09) | 0.29    |
|                   | Other     | 359 (18.15)    | 0.98 (0.83, 1.16)   | 0.80    | 0.99 (0.86, 1.14) | 0.90    |
|                   | White     | 6,889 (16.98)  | Reference           |         | Reference         |         |
| <b>Region</b>     |           |                |                     | 0.004   |                   | 0.46    |
|                   | Midwest   | 2,246 (16.30)  | 0.65 (0.52, 0.82)   | 0.0003  | 0.93 (0.81, 1.06) | 0.25    |
|                   | South     | 2,917 (16.73)  | 0.69 (0.56, 0.84)   | 0.0002  | 0.91 (0.80, 1.03) | 0.13    |
|                   | West      | 1,422 (16.64)  | 0.67 (0.53, 0.86)   | 0.001   | 0.91 (0.79, 1.05) | 0.17    |
|                   | Northeast | 1,847 (20.01)  | Reference           |         | Reference         |         |
| <b>At 3 Years</b> | Overall   | 15,857 (32.37) |                     |         |                   |         |
| <b>Sex</b>        |           |                |                     |         |                   |         |
|                   | Female    | 8,150 (35.19)  | 1.19 (1.14, 1.23)   | <.0001  | 0.98 (0.94, 1.03) | 0.41    |
|                   | Male      | 7,707 (29.84)  | Reference           |         | Reference         |         |
| <b>Race</b>       |           |                |                     | 0.0001  |                   | 0.0001  |
|                   | Black     | 1,056 (38.05)  | 1.31 (1.19, 1.44)   | <.0001  | 1.36 (1.23, 1.50) | <.0001  |
|                   | Hispanic  | 730 (29.48)    | 0.91 (0.85, 0.99)   | 0.02    | 0.96 (0.89, 1.04) | 0.30    |
|                   | Asian     | 456 (38.29)    | 0.95 (0.84, 1.08)   | 0.45    | 0.91 (0.79, 1.06) | 0.21    |
|                   | Other     | 656 (33.16)    | 0.95 (0.80, 1.13)   | 0.55    | 0.97 (0.84, 1.13) | 0.73    |
|                   | White     | 12,959 (31.94) | Reference           |         | Reference         |         |
| <b>Region</b>     |           |                |                     | 0.008   |                   | 0.20    |
|                   | Midwest   | 4,333 (31.44)  | 0.70 (0.55, 0.88)   | 0.002   | 0.99 (0.87, 1.13) | 0.88    |
|                   | South     | 5,535 (31.75)  | 0.72 (0.58, 0.89)   | 0.002   | 0.94 (0.84, 1.06) | 0.32    |

|           |               |                   |        |                   |      |
|-----------|---------------|-------------------|--------|-------------------|------|
| West      | 2,646 (30.96) | 0.65 (0.51, 0.84) | 0.0007 | 0.87 (0.75, 1.00) | 0.05 |
| Northeast | 3,343 (36.21) | Reference         |        | Reference         |      |

---

Adjusted for patients sociodemographic and lifestyles information (age, calendar year, BMI, smoking status), patients' medical history (atrial fibrillation/atrial flutter, COPD or asthma, diabetes, hyperlipidemia, hypertension, peripheral vascular disease (PVD), CAD, prior MI, cerebrovascular accident/transient ischemic attack, implantable cardioverter defibrillator, heart failure, anemia, pacemaker - biventricular/resync/ cardiac resynchronization therapy, dialysis (chronic), renal insufficiency, depression, prior PCI or CABG, valvular heart disease, systolic blood pressure at discharge, ejection fraction <40% or moderate or severe dysfunction), cardiac diagnosis (STEMI, NSTEMI, AMI unspecified, unstable angina, CAD), and hospital characteristics (geographic region, rural location, teaching status, number of beds, Primary PTCA, cardiac surgery, heart transplants site), patients' insurance status (Medicaid, Medicare, other, No insurance/Undetermined/Missing), medication use prior to hospital admission (ACE inhibitors, beta-blocker, aspirin, lipid-lowering agents), medication use at hospital discharge (ACE inhibitors, beta-blocker, aspirin, lipid-lowering agents), and the GWTG-CAD quality of care composite performance score.

BMI- body mass index; COPD- chronic obstructive pulmonary disease; PVD- peripheral vascular disease; CAD- coronary artery disease; MI- myocardial infarction; PCI- percutaneous coronary intervention; CABG- coronary artery bypass grafting; STEMI- ST-elevation myocardial infarction; NSTEMI- Non-ST-elevation myocardial infarction; AMI- acute myocardial infarction; PTCA- percutaneous transluminal coronary angioplasty

**Table S3. Mediation analysis by cardiac rehabilitation referral.**

| Exposures               | Cardiac Rehabilitation Referral | Natural Direct Effect |        | Natural Indirect Effect |        | Total Effect      |        |
|-------------------------|---------------------------------|-----------------------|--------|-------------------------|--------|-------------------|--------|
|                         |                                 | OR (95% CI)           | P      | OR (95% CI)             | P      | OR (95% CI)       | P      |
| <b>1 Year Mortality</b> |                                 |                       |        |                         |        |                   |        |
| <b>Sex</b>              |                                 |                       |        |                         |        |                   |        |
| Female vs Male          | Yes                             | 0.93 (0.87, 0.99)     | 0.01   | 1.01 (1.01, 1.02)       | <.0001 | 0.94 (0.89, 1.00) | 0.05   |
|                         | No                              | Reference             |        | Reference               |        | Reference         |        |
| <b>Race</b>             |                                 |                       |        |                         |        |                   |        |
| Black vs White          | Yes                             | 1.20 (1.07, 1.34)     | 0.001  | 1.01 (1.00, 1.03)       | 0.0096 | 1.22 (1.09, 1.37) | 0.0006 |
|                         | No                              | Reference             |        | Reference               |        | Reference         |        |
| Hispanic vs White       | Yes                             | 0.81 (0.71, 0.93)     | 0.002  | 1.06 (1.04, 1.09)       | <.0001 | 0.86 (0.75, 0.99) | 0.03   |
|                         | No                              | Reference             |        | Reference               |        | Reference         |        |
| Asian vs White          | Yes                             | 0.76 (0.62, 0.95)     | 0.01   | 1.10 (1.04, 1.17)       | 0.0019 | 0.84 (0.69, 1.02) | 0.08   |
|                         | No                              | Reference             |        | Reference               |        | Reference         |        |
| Other vs White          | Yes                             | 0.97 (0.83, 1.12)     | 0.63   | 1.01 (1.00, 1.03)       | 0.0749 | 0.98 (0.85, 1.13) | 0.76   |
|                         | No                              | Reference             |        | Reference               |        | Reference         |        |
| <b>3 Year Mortality</b> |                                 |                       |        |                         |        |                   |        |
| <b>Sex</b>              |                                 |                       |        |                         |        |                   |        |
| Women vs Men            | Yes                             | 0.94 (0.89, 0.98)     | 0.003  | 1.01 (1.01, 1.02)       | <.0001 | 0.95 (0.91, 0.99) | 0.02   |
|                         | No                              | Reference             |        | Reference               |        | Reference         |        |
| <b>Race</b>             |                                 |                       |        |                         |        |                   |        |
| Black vs White          | Yes                             | 1.25 (1.13, 1.37)     | <.0001 | 1.01 (1.00, 1.02)       | 0.0037 | 1.26 (1.14, 1.40) | <.0001 |
|                         | No                              | Reference             |        | Reference               |        | Reference         |        |
| Hispanic vs White       | Yes                             | 0.84 (0.76, 0.93)     | 0.0006 | 1.04 (1.02, 1.07)       | 0.0002 | 0.88 (0.79, 0.98) | 0.01   |
|                         | No                              | Reference             |        | Reference               |        | Reference         |        |
| Asian vs White          | Yes                             | 0.83 (0.69, 1.00)     | 0.05   | 1.06 (1.02, 1.11)       | 0.0024 | 0.89 (0.75, 1.06) | 0.18   |
|                         | No                              | Reference             |        | Reference               |        | Reference         |        |
| Other vs White          | Yes                             | 0.94 (0.82, 1.09)     | 0.41   | 1.02 (1.00, 1.04)       | 0.0093 | 0.96 (0.83, 1.11) | 0.58   |
|                         | No                              | Reference             |        | Reference               |        | Reference         |        |

Adjusted for patients sociodemographic and lifestyles information (age, calendar year, BMI, smoking status), patients' medical history (atrial fibrillation/atrial flutter, COPD or asthma, diabetes, hyperlipidemia, hypertension, peripheral vascular disease (PVD), CAD, prior MI, cerebrovascular accident/transient ischemic attack, implantable cardioverter defibrillator, heart failure, anemia, pacemaker - biventricular/resync/ cardiac resynchronization therapy, dialysis (chronic), renal insufficiency, depression, prior PCI or CABG, valvular heart disease, systolic blood pressure at discharge, ejection fraction <40% or moderate or severe dysfunction), cardiac diagnosis (STEMI, NSTEMI, AMI unspecified, unstable angina, CAD), and hospital characteristics (geographic region, rural location, teaching status, number of beds, Primary PTCA, cardiac surgery, heart transplants site), patients' insurance status (Medicaid, Medicare, other, No insurance/Undetermined/Missing), medication use prior to hospital admission (ACE inhibitors, beta-blocker, aspirin, lipid-lowering agents), medication use at hospital discharge (ACE inhibitors, beta-blocker, aspirin, lipid-lowering agents), and the GWTG-CAD quality of care composite performance score.
